# Supplementary material for: Risk Factors for Recurrence, Complications and Mortality in Clostridium difficile Infection: A Systematic Review
Source: PLOS journal article supplement (doi:10.1371/journal.pone.0098400), 2014-06-04
Supplement: S4 (10.1371/journal.pone.0098400.s004) [file journal.pone.0098400.s004]

**Table S4- Characteristics of included studies addressing risk factors for multiple outcomes**

| Study<br>Year of<br>diagnosis*<br>Country          | Main outcome(s)<br>definition                                                                                                                                                                                                                                 | Design<br>Follow-<br>up<br>(days) | Diagnostic<br>test                          | Population                                          | Comparison<br>group                    | Quality<br>variables         | Mean/<br>median<br>age $\pm$ SD<br>Dispersion | N   | %<br>Rec <sup>‡</sup><br>(n) | %<br>Com <sup>†</sup><br>(n)            | %<br>Death (n)                           | Method          | Nv                                  | EPV                                    |
|----------------------------------------------------|---------------------------------------------------------------------------------------------------------------------------------------------------------------------------------------------------------------------------------------------------------------|-----------------------------------|---------------------------------------------|-----------------------------------------------------|----------------------------------------|------------------------------|-----------------------------------------------|-----|------------------------------|-----------------------------------------|------------------------------------------|-----------------|-------------------------------------|----------------------------------------|
| Bauer 2011[46]<br>2008<br>34 European<br>countries | <b>Recurrence<br/>Complication:</b> ICU<br>admission or colectomy,<br>or death                                                                                                                                                                                | PC<br>90                          | Toxin A and<br>B EIA,<br>direct CTA,<br>PCR | Out and<br>inpatients<br>with CDI                   | Non-recurrent<br>and cured<br>patients | SI, PE,<br>AB, IS            | 71 <sup>¥</sup><br>IQR=56-81                  | 509 | 18<br>(86)                   | 7.4<br>(34)                             | 22 (101)                                 | 2-levels<br>MLR | 13 <sup>‡</sup><br>/15 <sup>†</sup> | 6.6 <sup>‡</sup> /<br>2.9 <sup>†</sup> |
| Cadena 2010<br>[54]<br>2003-2005<br>USA            | <b>Recurrence:</b> recurrent<br>symptoms of CDI after<br>completion of therapy and<br>initial complete<br>resolution;<br><b>90-day death</b>                                                                                                                  | RC<br>>90                         | Toxin A and<br>B EIA                        | Inpatients in<br>veterans'<br>health care<br>system | Non-recurrent<br>CDI                   | SI, PE, IS,<br>RS, AB,<br>AU | All ages                                      | 129 | 29<br>(38)                   | -                                       | 29 (38)                                  | MLR             | 3                                   | 12.7                                   |
| Cloud 2009 [43]<br>2004-2006<br>USA                | <b>Severe CDI:</b> death or<br>CDI as contributor, ICU<br>admission or with CDI as<br>contributing factor, toxic<br>megacolon or colectomy;<br><b>60-day inhospital death</b><br><b>Treatment failure:</b><br>change from MTZ to or<br>addition of vancomycin | PC<br>60                          | Toxin A<br>EIA                              | Inpatients<br>with CDI                              | Cured patients<br>Survivors            | SI, AB,<br>AU                | 67.3 <sup>§</sup>                             | 272 | -                            | 22.1<br>(60)<br>21<br>(53) <sup>£</sup> | 4 (11)                                   | MLR             | 5                                   | 12                                     |
| Cober 2009 [51]<br>2006<br>USA                     | <b>90-day death</b><br><b>Treatment failure:</b> lack<br>of improvement after 5<br>days or change in<br>treatment regimen                                                                                                                                     | RC                                | Toxin A or<br>B EIA                         | 80 and older<br>inpatients                          | Survivors                              | RS, AB,<br>AU                | 84 $\pm$ 4.1 <sup>§</sup><br>80-94            | 70  | 17<br>(12)                   | 25.7<br>(18) <sup>£</sup>               | 17.1 (12)                                | MLR             | 9                                   | 1.3                                    |
| de Isusi 2003<br>[102]<br>1999-2001<br>Spain       | <b>Failure or recurrence:</b><br>absence of clinical<br>resolution or reappearance<br>of clinical symptoms $\geq$ 7<br>days;<br><b>Death:</b> Inhospital all-<br>cause                                                                                        | RC                                | Toxin A<br>EIA                              | Inpatients<br>CDI                                   | Cured patients<br>Survivors            | SI, PE, IS,<br>RS, AB,<br>AU | 71.7 <sup>§</sup><br>20-99                    | 113 | 18<br>(20)                   | 20.7<br>(23) <sup>£</sup>               | 30.1 (34)<br>19.5 (22)<br>CDI<br>related | MLR             | 7                                   | 2.6                                    |

|                                             |                                                                                                                                                                                                                                                                                                                                                                |          |                                                                        |                                                                  |                                                     |                   |                                  |     |               |                                      |          |                         |                                |                                         |
|---------------------------------------------|----------------------------------------------------------------------------------------------------------------------------------------------------------------------------------------------------------------------------------------------------------------------------------------------------------------------------------------------------------------|----------|------------------------------------------------------------------------|------------------------------------------------------------------|-----------------------------------------------------|-------------------|----------------------------------|-----|---------------|--------------------------------------|----------|-------------------------|--------------------------------|-----------------------------------------|
| Khanna 2012 [52]<br>1991- 2005<br>USA       | <b>Recurrence:</b> CDI within 8 weeks after symptom resolution;<br><b>Severe-complicated:</b> hypotension, sepsis, ileus, toxic megacolon, perforation, need for ICU admission, surgery or 30-day death;<br><b>Treatment failure:</b> persistent symptoms leading to change initial treatment within 14 days due to nonresponse or intolerable adverse effects | RC       | Direct CTA                                                             | All cases of CDI                                                 | None                                                | SI, PE, AB, AU    | 67.6 <sup>¥</sup><br>10d- 102yrs | 385 | 30.1<br>(116) | 7 (27)/<br>20.2<br>(75) <sup>£</sup> | -        | MLR                     | 5                              | 23.2 <sup>‡</sup> /<br>5.4 <sup>†</sup> |
| Kim 2013[91]<br>2005- 2010<br>South Korea   | <b>Response failure to treatment:</b> no improvement in diarrhoea by day 10<br><b>All cause 30-day mortality</b>                                                                                                                                                                                                                                               | RC<br>30 | Toxin A<br>EIA (2005-<br>2008);<br>Toxin A and<br>B EIA<br>(2008-2010) | Patients<br>with CDI                                             | Response/<br>survivors                              | AB                | 64.4 <sup>§</sup><br>±14.1       | 536 | -             | 4.9 <sup>£</sup><br>(26)             | 9 (48)   | MLR                     | 4 <sup>£</sup> /6              | 6.5 <sup>£</sup> /8                     |
| Jung 2010 [103]<br>1998-2008<br>South Korea | <b>Recurrence:</b> reappearance of symptoms or positive toxin assay within 90 days of treatment response<br><b>Treatment failure:</b> persistence or incomplete resolution of symptoms, or positive toxin assay, >10 days of treatment                                                                                                                         | RC       | Toxin A<br>EIA                                                         | Adult<br>inpatients                                              | Non-recurrent<br>and<br>cured patients              | IS, AB,<br>AU     | 62.5±13.8 <sup>§</sup><br>23-88  | 117 | 11<br>(13.4)  | 12.6<br>(14) <sup>£</sup>            | -        | MLR                     | 3 <sup>£</sup>                 | 4.3                                     |
| Morrison 2011 [58]<br>2004-2008<br>USA      | <b>Complications:</b> CDI-associated mortality, surgery and toxic megacolon                                                                                                                                                                                                                                                                                    | RC       | NS toxin<br>assay                                                      | Active-duty<br>military,<br>spouses,<br>children and<br>retirees | NR                                                  | IS, RS,<br>AB, AU | 53 <sup>¥</sup><br>1-99          | 485 | -             | 9.7<br>(47)                          | 4.7 (23) | MLR                     | 4 <sup>†</sup> /2              | 11.7 <sup>†</sup> /<br>11.5             |
| Pepin 2006 [26]<br>1991-2005<br>Canada      | <b>Recurrence</b><br><b>Complications during 1<sup>st</sup> recurrence :</b> toxic megacolon, perforation, colectomy, shock requiring vasopressors or 30-day all-cause death                                                                                                                                                                                   | RC<br>60 | Direct CTA                                                             | Patients<br>who<br>experienced<br>at least 1<br>recurrence       | Patients<br>without a 2 <sup>nd</sup><br>recurrence | SI, IS, AB        | All ages                         | 463 | 63.6<br>(98)  | 11<br>(51)                           | 9.3 (43) | Cox<br>hazards<br>model | 3 <sup>‡</sup> /6 <sup>†</sup> | 32.7 <sup>‡</sup> /<br>8.5 <sup>†</sup> |

|                                            |                                                                                                                                                                |          |                         |                                                           |                                            |                |                            |     |           |                      |                                              |                           |   |             |
|--------------------------------------------|----------------------------------------------------------------------------------------------------------------------------------------------------------------|----------|-------------------------|-----------------------------------------------------------|--------------------------------------------|----------------|----------------------------|-----|-----------|----------------------|----------------------------------------------|---------------------------|---|-------------|
| Søes 2012 [49]<br>2006- 2007<br>Denmark    | <b>Clinical severity score (≥1.5 pts):</b> level of diarrhoea, systemic symptoms, result of sigmoidoscopy<br><b>Mortality:</b> 30- day                         | PC<br>30 | PCR on positive culture | Inpatients positive for <i>C. difficile</i> stool culture | None                                       | SI, IS, RS, AB | 69 <sup>¥</sup>            | 82  | -         | 47.6 (39)            | 11 (9)                                       | MLR/<br>Cox hazards model | 6 | 6.5/<br>1.5 |
| Solomon 2013 [93]<br>2008- 2009<br>Ireland | <b>All-cause 30-day mortality</b><br><b>Mortality directly attributable to CDI</b><br><b>Recurrence</b> 60 days after resolution of primary diarrhoeal episode | PC       | Toxin A and B EIA       | Consecutive CDI cases                                     | Survivors                                  | None           | 74.5 <sup>§</sup><br>35-97 | 86  | 18.6 (16) | -                    | 16.3 (14)                                    | MLR                       | 5 | 2.8         |
| Wilson 2010 [104]<br>2007-2008<br>UK       | <b>Mortality:</b> 30-day all-cause and CDI-related<br><b>Early treatment failure:</b> change of 1 <sup>st</sup> choice, dose, or route of administration       | PC<br>30 | Toxin A and B EIA       | New CDI cases                                             | Survivors B1/027, DH/106 and other strains | SI, IS         | NR                         | 128 | 19.6 (22) | 50 (57) <sup>£</sup> | 35.9 (46) overall<br>17.2 (22) CDI related** | MLR                       | 6 | 3.7**       |

Nv= number of variables in the final model. EPV= events per variable. MLR=multivariate logistic regression. NR= not reported.

\*Year of diagnosis= year(s) of cases diagnosis.

‡ Rate or % of recurrence. † Rate or % of complicated CDI. £ Treatment failure. \*\* Death in treated patients.

§ Mean age. ¥ Median age.

Design: RC= retrospective cohort; PC=prospective cohort; RCC=retrospective case-control; PCC=prospective case-control.

Diagnostic test: NS= Not specified, EIA= Enzyme immunoassay, CTA= cytotoxin assay, PCR= Polymerase chain reaction.

Quality variables: SI= site of acquisition of the infection (nosocomial vs. community-acquired), PE= previous episode(s) of CDI, IS= immunosuppression, RS= recent surgeries and procedures, AB= recent antibiotherapy, AU= use of anti-ulcer medication.
